# Supplementary material for: Controllable gold nanoparticle deposition on carbon nanotubes and their application in immunosensing
Source: Royal Society of Chemistry journal article supplement (doi:10.1039/c5ra07990j), 2015-01-01
Supplement: c5ra07990j1.pdf [file c5ra07990j1.pdf]

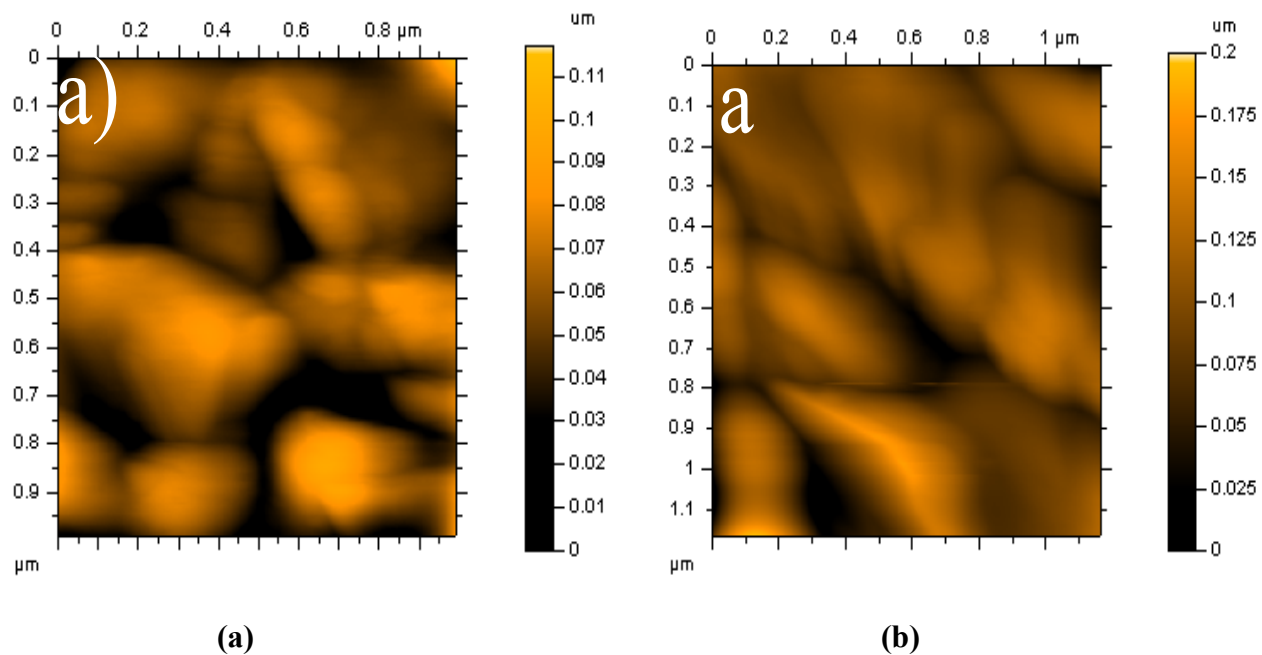

**Fig S1.** Topography AFM image (a) CNT-AuNPs and HRP tagged rabbit antimouse IgG on GC electrode, (b) Immunoconjugate is formed after interaction with mouse IgG on CNT-AuNPs and HRP tagged rabbit antimouse IgG modified GC electrode.
