# Supplementary material for: Controllable gold nanoparticle deposition on carbon nanotubes and their application in immunosensing
Source: Royal Society of Chemistry journal article supplement (doi:10.1039/c5ra07990j), 2015-01-01
Supplement: c5ra07990j2.pdf [file c5ra07990j2.pdf]

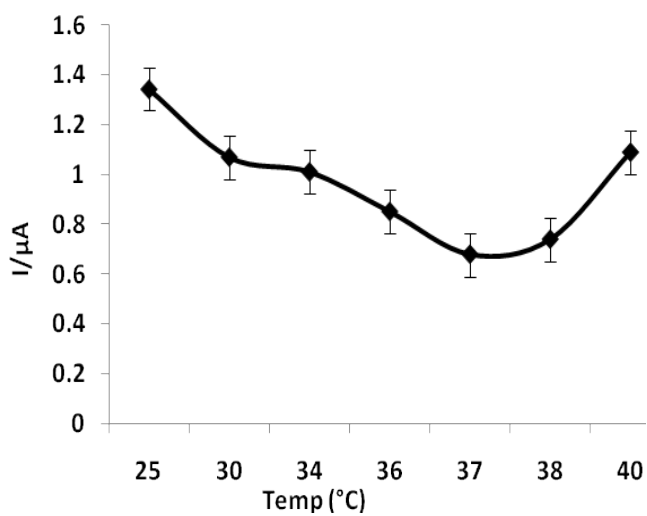

(a)

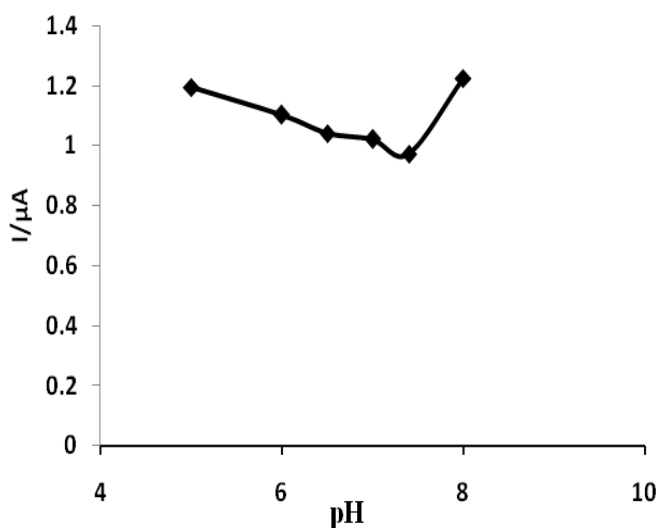

(b)

**Fig S2 (a).** Effect of temperature on DPV peak current of the immunosensor.

**Fig S2 (b).** Effect of pH on DPV peak current of the immunosensor.
